# Supplementary material
Source: MDPI journal article supplement (https://www.mdpi.com/2311-5637/10/2/96)
Supplement: s1 [file s1]

## Supplementary Materials

Table S1: Measured methane yields (L/kg-VS) at F/I ratio of 2 from biomass cut to 2.54 cm or 1.27 cm lengths.

| 2.54-cm biomass |                         |                         |                         | 1.27-cm biomass         |                         |                         |
|-----------------|-------------------------|-------------------------|-------------------------|-------------------------|-------------------------|-------------------------|
| TS              | 1 <sup>st</sup> harvest | 2 <sup>nd</sup> harvest | 3 <sup>rd</sup> harvest | 1 <sup>st</sup> harvest | 2 <sup>nd</sup> harvest | 3 <sup>rd</sup> harvest |
| 4%              | 2.10±0.20               | 45.74±0.20              | 172.26±5.65             | 2.21±2.07               | 22.53±7.12              | 123.99±0.52             |
| 6%              | 3.20±0.15               | 34.89±1.22              | 89.57±1.94              | 0.30 ±0.21              | 2.94±2.61               | 92.39±19.57             |
| 8%              | 4.30±0.21               | 20.83±0.48              | 65.93±5.79              | 0.39 ±0.26              | 5.29±4.92               | 46.06±2.96              |

Table S2: Measured methane yields (L/kg-VS) from biomass cut into 2.54-cm lengths.

| Inoculation rate F/I= 1 |                         |                         | After alkali pretreatment and ensiling |                         |                         |
|-------------------------|-------------------------|-------------------------|----------------------------------------|-------------------------|-------------------------|
| 1 <sup>st</sup> harvest | 2 <sup>nd</sup> harvest | 3 <sup>rd</sup> harvest | 1 <sup>st</sup> harvest                | 2 <sup>nd</sup> harvest | 3 <sup>rd</sup> harvest |
| 1.89±0.20               | 50.66±2.30              | 202.00±2.17             | 5.65±1.42                              | 270.42±3.10             | 193.86±21.16            |

Table S3: Characteristics of AD digestate after alkali pretreatment and ensiling.

| Composition                        | 1 <sup>st</sup> harvest | 2 <sup>nd</sup> harvest | 3 <sup>rd</sup> harvest |
|------------------------------------|-------------------------|-------------------------|-------------------------|
| pH                                 | 5.47 ±0.09              | 7.96±0.01               | 8.03±0.06               |
| Alkalinity, mg/L CaCO <sub>3</sub> | 3,640±43                | 4,677±82                | 4,687±89                |
